# Supplementary material for: The Influence of Long Working Hours, Occupational Stress, and Well-Being on Depression Among Couriers in Zhejiang, China
Source: Frontiers journal article supplement (doi:10.3389/fpsyg.2022.928928), 2022-06-23
Supplement: Data_Sheet_1.PDF [file Data_Sheet_1.PDF]

Table1- Relationship between working hours and depression

| Working hours | Model 1<br>Depression | Model 2<br>Depression | Model 3<br>Depression |
|---------------|-----------------------|-----------------------|-----------------------|
| ≤48h          | 1                     | 1                     | 1                     |
| 49-62h        | 1.13 (0.78~1.64)      | 1.10 (0.71~1.69)      | 1.12 (0.73~1.72)      |
| P             | 0.514                 | 0.672                 | 0.612                 |
| 63-77h        | 1.76 (1.25~2.50)      | 1.79 (1.78~2.72)      | 1.86 (1.22~2.83)      |
| P             | 0.001                 | 0.006                 | 0.004                 |
| 78-92h        | 1.75 (1.18~2.6)       | 1.81 (1.13~2.90)      | 1.94 (1.21~3.12)      |
| P             | 0.005                 | 0.014                 | 0.006                 |
| ≥93           | 2.84 (1.57~5.13)      | 4.29 (2.12~8.67)      | 1.17 (1.88~7.65)      |
| P             | 0.001                 | <0.001                | <0.001                |

Note: Model 1: Binary Logistic regression analysis;

Model 2: Multivariate Logistic regression analysis, adjusted for the different levels of occupational stress;

Model 3: Multivariate Logistic regression analysis, adjusted for whether had poor well-being.
